# Supplementary material for: Urinary p75ECD: A prognostic, disease progression, and pharmacodynamic biomarker in ALS
Source: PubMed Central journal article supplement — Neurology. 2017 Mar 21;88(12):1137–43. doi: 10.1212/WNL.0000000000003741 (PMC5373786; doi:10.1212/wnl.0000000000003741), 2017-03-21
Supplement: supp_WNL.0000000000003741_Table_e-1.pdf [file supp_WNL.0000000000003741_Table_e-1.pdf]

**Supplementary Table e-1:** Intra and inter assay variation of the p75<sup>ECD</sup> ELISA

| Parameter        | Individual samples      |       | Overall |
|------------------|-------------------------|-------|---------|
| Intra assay CV % | High p75 <sup>ECD</sup> | 6.3%  | 6.6%    |
|                  | Med p75 <sup>ECD</sup>  | 3.6%  |         |
|                  | Low p75 <sup>ECD</sup>  | 9.9%  |         |
| Inter-assay CV%  | High p75 <sup>ECD</sup> | 10.8% | 12.5%   |
|                  | Med p75 <sup>ECD</sup>  | 11.5% |         |
|                  | Low p75 <sup>ECD</sup>  | 15.1% |         |

Urinary samples with low, medium, and high p75<sup>ECD</sup>/ml measurements were tested in duplicate on 8 plates. Intra-assay coefficient of variation (CV) was calculated within each plate and the average CV across all the plates for the three samples calculated. Inter-assay CV was calculated for each of the three samples across all the plates. CV% calculated by dividing the standard deviation by the mean, and converting to a percentage (x100) and the overall CV determined across the 3 samples for both intra and inter assay CVs.
